# Supplementary material
Source: ML conference proceedings conference paper supplement (https://openaccess.thecvf.com/content/CVPR2023/html/Chi_BEV-SAN_Accurate_BEV_CVPR_2023_paper.html)
Supplement: Supplementary file 2 [file Chi_BEV-SAN_Accurate_BEV_CVPR_2023_supplemental.zip]

Archive with 2 entries (2 files):
- CVPR_2023_BEVSAN_Supplementary/appendix.pdf
- CVPR_2023_BEVSAN_Supplementary/BEV-SAN_code.zip
